# Supplementary material for: Anomalous large capacitances of porous carbons based on protium adsorption
Source: Royal Society of Chemistry journal article supplement (doi:10.1039/d2cc01338j), 2022-01-01
Supplement: d2cc01338j1.pdf [file d2cc01338j1.pdf]

Electronic supplementary information (ESI)

## **Anomalous Large Capacitances of Porous Carbon Anodes**

Yoshitsugu Kojima<sup>\*a</sup>, Masakuni Yamaguchi<sup>a</sup>, Haruo Sawa<sup>b</sup>, Katsuhide Kikuchi<sup>c</sup>,  
Noriyuki Hiramitsu<sup>d</sup>, Masahiko Kimbara<sup>e</sup>, Haruyuki Nakanishi<sup>f</sup>, Yasuhiro Takahashi<sup>f</sup>

<sup>a</sup> Natural Science Center for Basic Research and Development, Hiroshima University,  
1-3-1, Kagamiyama, Higashi-Hiroshima, Hiroshima 739-8530, Japan

<sup>b</sup> Chemio Co. Ltd., 3-30, Minami Shinta-cho, Kochi 781-8005, Japan

<sup>c</sup> SOKEN, Inc., 500-20, Minamiyama, Komenoki-cho, Nissin, Aichi 470-011, Japan

<sup>d</sup> Tsuchiya Co. Ltd., 9-29, Kamimaezu 2-chome, Naka-ku, Nagoya 460-8330, Japan

<sup>e</sup> GF Innovation Ltd., 2235-7, Shimoona, Mikkabi-cho, Kita-ku, Hamamatsu, Shizuoka  
431-1424, Japan

<sup>f</sup> Toyota Motor Corporation, 1, Toyota-cho, Toyota, Aichi 471-8571, Japan

**\* Corresponding author. Tel.: +81 82 424 3904; fax: +81 82 424 5744.**

***E-mail address: kojimay@hiroshima-u.ac.jp (Y. Kojima).***

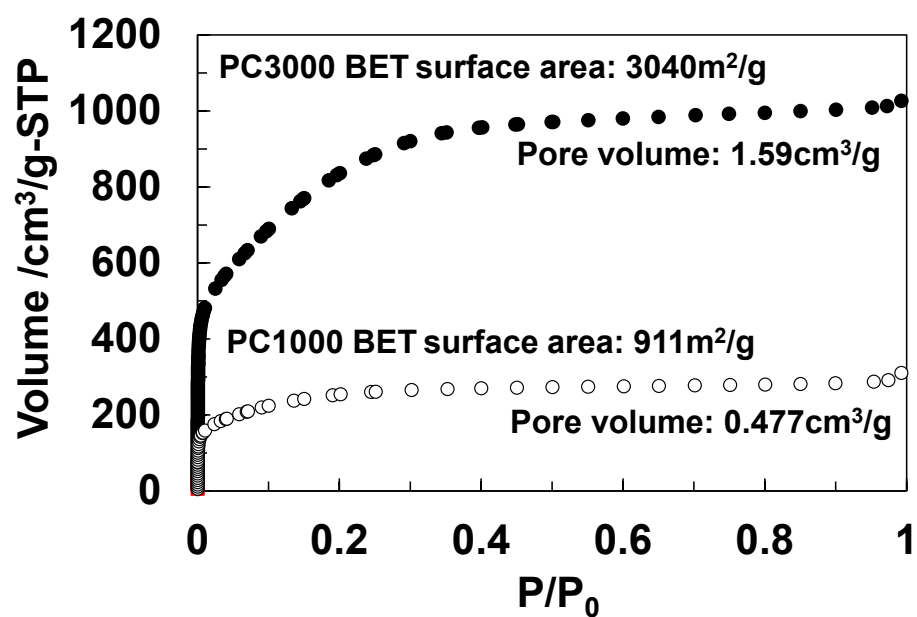

Fig. S1 N<sub>2</sub> adsorption isotherms of (black) PC3000 and (white) PC1000.

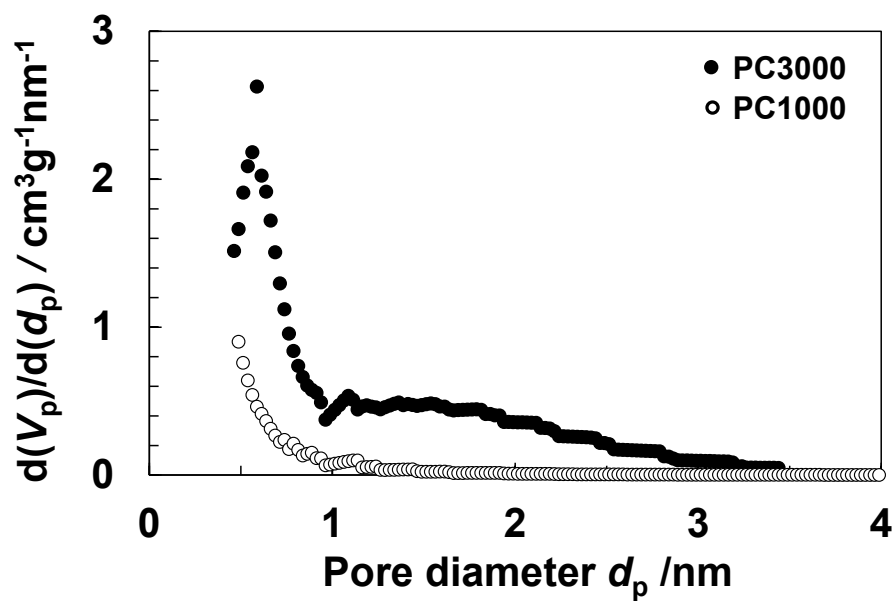

Fig. S2 HK pore size distributions of PC3000 and PC1000 ( $V_p$ : pore volume).

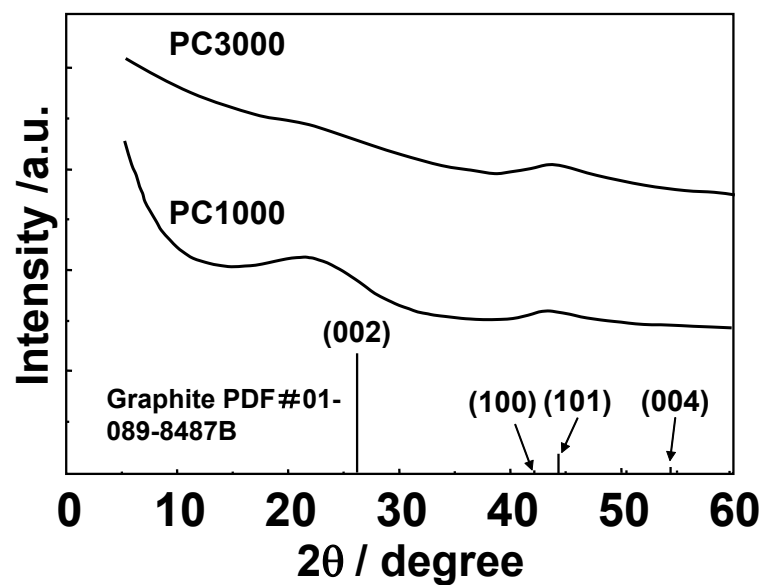

**Fig. S3** XRD patterns of PC3000 and PC1000 (Rigaku-Rint 2500V,  $\text{CuK}\alpha$  radiation,  $\lambda=0.15418\text{nm}$ , graphite monochromator, 40kV, 200mA).

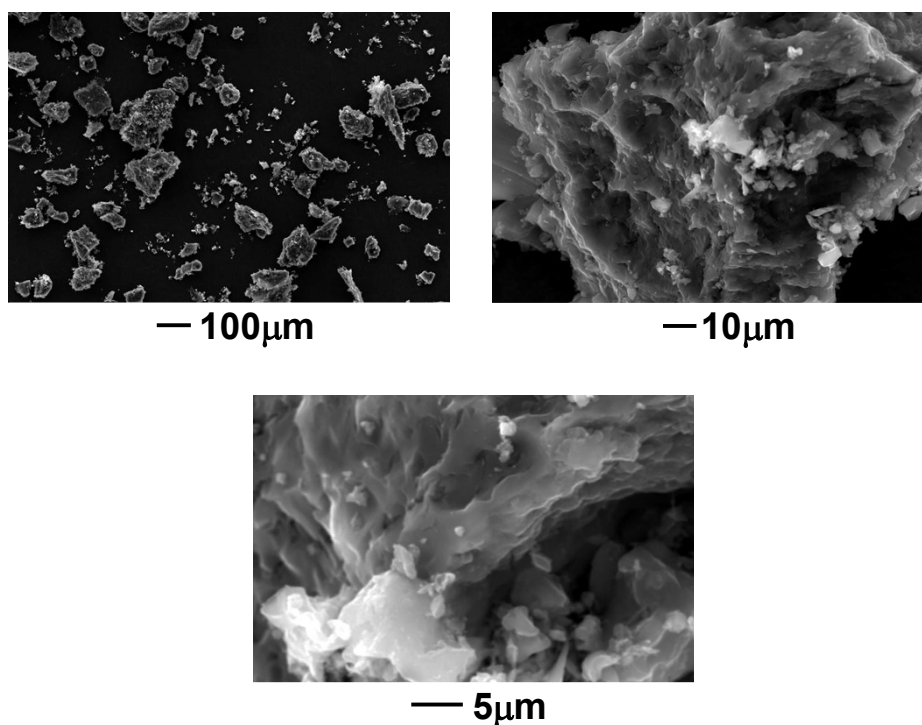

**Fig. S4** SEM images of PC3000 (JEOL Ltd., JSM-6380 Scanning Electron Microscope).

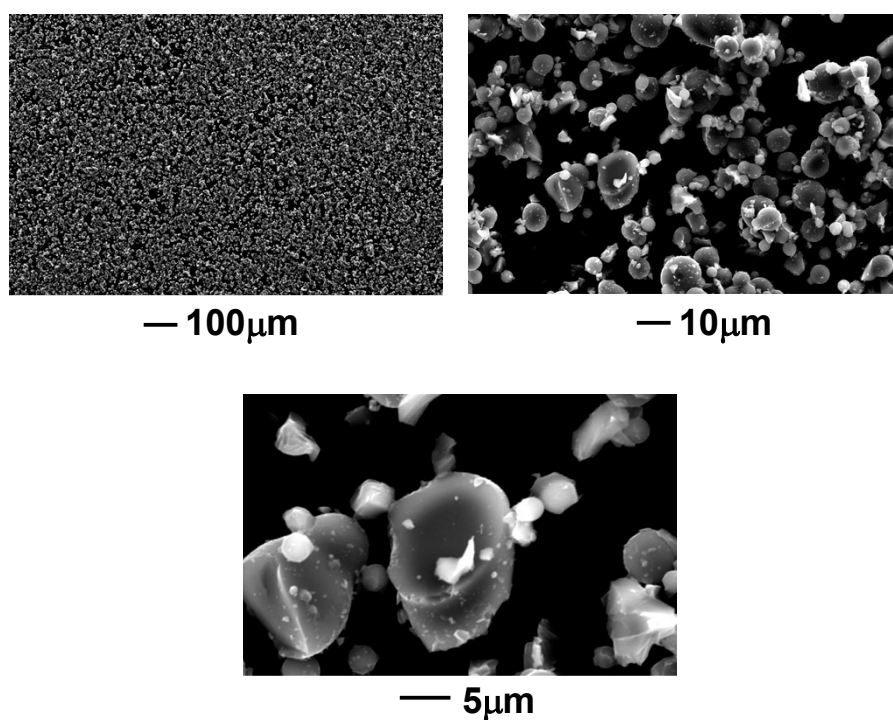

**Fig. S5** SEM images of PC1000 (JEOL Ltd., JSM-6380 Scanning Electron Microscope).

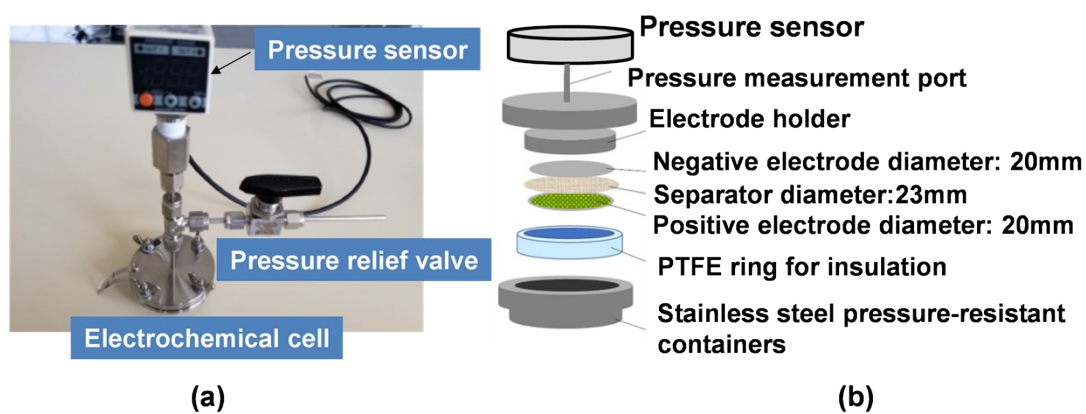

**Fig. S6** Overview and schematic diagram of electrochemical cell to measure pressure in the cell and charge /discharge capacity of porous carbons.

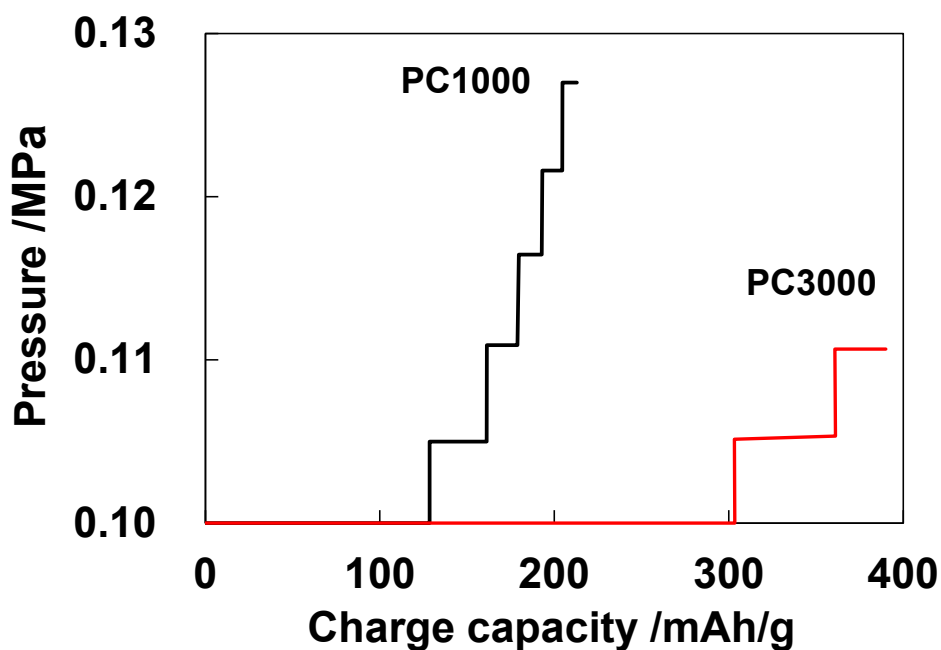

Fig. S7 Relations between gas pressures and charge capacities.

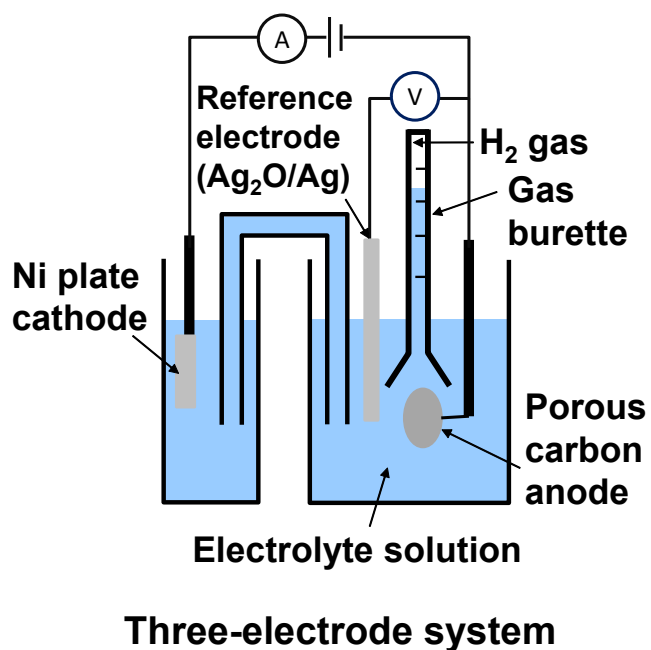

Fig. S8 Schematic diagram of three-electrode system with gas burette to measure charge capacity removed  $H_2$  evolution and standard electrode potential (electrolyte solution, KOH 2N, 7N, NaOH 2N, 8N).

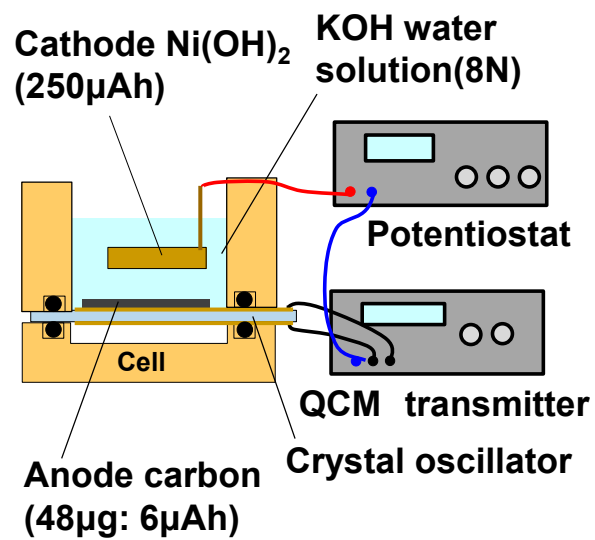

### Quartz crystal microbalance system

**Fig. S9** Schematic diagram of quartz crystal microbalance system (cathode  $\text{Ni(OH)}_2$ , anode PC1000, electrolyte: KOH, concentration: 8N).
